# Supplementary material
Source: Elsevier journal article supplement (https://www.sciencedirect.com/science/article/pii/S1695403320302228)
Supplement: mmc1 [file S1695403320302228:mmc1.pdf]

Estimado Editor,

Emito esta carta en respuesta a los cambios propuestos por los revisores, desglosando y explicando cada una de las cuestiones y los cambios realizados. En este documento las tablas ya existentes el manuscrito original han sido nombradas de forma numérica, igual que aparecen en el texto original, mientras que las tablas nuevas han sido nombradas con terminación alfabética (una de ellas se incorpora al nuevo manuscrito), para evitar la inducción a confusión. La tabla 1 ha sido readaptada en 2 tablas, para cumplir con la normativa sobre el tamaño de las tablas. Por último, la longitud del texto y las referencias bibliográficas correspondientes han sido adaptadas para cumplir con las normas de extensión de la revista.

Comentario 1. - En los 21 años de recogida han variado tratamientos importantes que pueden influir en la gravedad de la ROP (CPAP en vez de ventilación mecánica, administración de EPO + Fe, aumento en los niveles deseados de Sat Hb a  $\geq 90\%$  en los últimos años, etc.). Estos factores deberían recogerse como variables para ver su posible influencia, o al menos citarlos como factor de "debilidad" del trabajo en la discusión.

Respuesta al comentario 1. - Efectivamente, durante 1999 y 2019, se han realizado cambios relevantes en los protocolos de cuidado de los neonatos prematuros, que se cita en la discusión y las limitaciones del estudio. Sin embargo, en la nueva versión del manuscrito se amplía esta información en el párrafo de limitaciones y debilidades del estudio. Durante los años de la investigación, hemos asistido a dos grandes acontecimientos:

- El cambio en los protocolos de administración de oxígeno, para alcanzar cifras de saturación más bajas, mediante el programa OWL (Oxygen With Love).(1)(2) Entre el mes de agosto de 2009 y el año 2012 se implantó este programa en el centro, por lo que podríamos distinguir en el estudio, un período comprendido entre agosto 2009 y 2019, en el que se garantizó la monitorización de oxígeno, el uso de alarmas de pulsioximetría ajustadas y técnicas de ventilación no invasiva, y otro período, comprendido entre 1999 y julio de 2009 en el cual no se empleaba este protocolo, por lo que las cifras de saturación de los recién nacidos eran generalmente más altas. (1)
- A partir de 2009, a raíz del estudio publicado por Filho et al. (3), sobre el posible efecto negativo de la pobre ganancia de peso en las primeras 6 semanas sobre la retinopatía del prematuro, y de la descripción del algoritmo WINROP (4) se comenzó a dar mayor importancia en nuestro centro a la ganancia de peso postnatal y a aplicar una alarma en aquellos neonatos con ganancias de peso postnatales  $< 7\text{g/día}$ . (1)

Se dispone de las cifras de  $\text{FiO}_2$  de los recién nacidos, que se añaden en la nueva versión del manuscrito, sin embargo, los datos relativos al empleo de CPAP y las cifras de saturación de oxígeno de los recién nacidos no se hallan recogidos de manera homogénea, que permita un correcto análisis de los mismos en el estudio de su relación con la retinopatía del prematuro (ROP) y la ganancia de peso.

Anexo Tabla 1.

| Variable                    | Total                               | ROP no tratada                      | ROP tratada                         | p |
|-----------------------------|-------------------------------------|-------------------------------------|-------------------------------------|---|
| FiO <sub>2</sub> máxima (%) | 32.58 ± 16.64<br>(Min 21 / Max 100) | 42.00 ± 20.96<br>(Min 21 / Max 100) | 31.09 ± 16.22<br>(Min 21 / Max 100) | * |

\* p < 0.05; \*\* p < 0.001; \*\*\* p < 0.0001; † p > 0.05.

Comentario 2.- A mi parecer, el problema principal del trabajo es que el aumento de peso postnatal se expresa en g/día, en vez de en g/kg/día. Ello hace que, al comparar el grupo de ROP no grave con el de ROP grave, las cifras medias de 12,75 g/d versus 9,50 g/día (¡muy diferentes!) se conviertan en, respecto al peso de nacimiento, 11,29 g/kg/d versus 10,12 g/kg/día (¡muy POCO diferentes!), y que probablemente no muestren diferencia significativa, al menos clínicamente (1,17 g/kg/día).

Respuesta al comentario 2.- La unidad de medida empleada en la ganancia de peso en las primeras 4 semanas de vida resulta controvertida y generó un debate interno en nuestro grupo de investigación. Sin embargo, tras un exhaustivo análisis y revisión de la literatura, se decidió emplear la unidad g/día. Esta controversia entre las unidades de medida y las razones de emplear como unidad g/día se detallan a continuación, y serán recogidas de forma resumida en la discusión de la nueva versión del manuscrito.

En los distintos algoritmos de screening y detección de casos de ROP severa descritos en la literatura, encontramos diferentes unidades de medida de la ganancia de peso postnatal, sin embargo, existe cierta tendencia positiva hacia el empleo de g/día(4)(5)(6)(3)(7) en lugar de g/kg/día(8)(9)(10), mientras que en algunos estudios, como el caso de CO-ROP, se realiza el análisis con ambas unidades de medida. (11)

Tradicionalmente los recién nacidos de bajo peso al nacer se han relacionado con menores ganancias ponderales en el período neonatal y retrasos en el neurodesarrollo. Sin embargo, el bajo peso al nacimiento, pese a relacionarse con una mayor frecuencia de ROP y ROP severa, no constituye por sí solo un factor etiopatogénico de ROP, y deben ser considerados los factores concomitantes que en muchos casos son la causa del bajo peso. En la mayoría de los artículos publicados en la literatura, el bajo peso al nacer viene relacionado con factores gestacionales y de comorbilidad,(12)(13)(14) como ocurre en el concepto de neonato pequeño para su edad gestacional (PEG/SGA), en el que se considera el tamaño del neonato, adaptado a la edad gestacional. El concepto de PEG se centra en el momento del nacimiento, mientras que el concepto crecimiento intrauterino restringido (CIR), considera además la velocidad de crecimiento intrauterina. En la patogenia del PEG y del CIR se debe considerar el retraso en el crecimiento fetal provocado por causas maternas, placentarias y fetales y por la priorización del desarrollo de órganos vitales, como los del sistema nervioso,(13)(15) en perjuicio de otras estructuras como la retina. En esta

priorización desempeñan un papel primordial la insulina, el factor de crecimiento insulínico tipo 1 (IGF-1) y la hormona del crecimiento.(13)

La IGF-1 y su efecto permisivo sobre el factor de crecimiento del endotelio vascular (VEGF) son dos de los puntos de mayor relevancia en la fisiopatología de la ROP.(16)(17)(18) Así, se conoce que en recién nacidos de <28 semanas, los niveles de IGF-1 son muy inferiores a los del recién nacido a término (principalmente por la privación temprana del aporte placentario).(19) Hellström et al. describieron que el efecto de los bajos niveles de IGF-1 sobre la ROP es al menos tan fuerte como el de la edad gestacional y por consiguiente, del peso al nacer. (20) Los niveles de IGF-1, que fueron empleados en algoritmos de screening como WINROP,(21) posteriormente pasaron a ser sustituidos por la ganancia de peso (g/día), dada la correlación directa y estrecha entre ambos niveles. (22)(23)

Por tanto, a modo de resumen, la importancia de la nutrición intrauterina en la ganancia de peso durante el período neonatal y la menor ganancia de peso, peor crecimiento intrauterino, peor estado nutricional a las 36 semanas postmenstruales y retraso en el desarrollo, observados en el recién nacidos de ≤ 30 semanas de gestación,(12)(13)(14) nos llevaron a realizar los siguientes ajustes de la ganancia de peso:

- 1. Consideramos que la ganancia de peso postnatal como factor de riesgo/predictor/protector de ROP se podría considerar en g/día siempre que se emplee de forma conjunta con la edad gestacional, el peso al nacer y la comorbilidad del recién nacido prematuro, tal y como se indica en la discusión y conclusiones del manuscrito.
- 2. En caso de emplear una medida ajustada de ganancia de peso en las primeras 4 semanas de vida, esta debería ser ajustada por la edad gestacional. Los resultados serán incluídos anexos en la tabla 1 del manuscrito.

Anexo tabla 1.

| Variable                                                       | Total                                    | ROP no tratada                           | ROP tratada                              | p     |
|----------------------------------------------------------------|------------------------------------------|------------------------------------------|------------------------------------------|-------|
| Ganancia de peso ajustada por edad gestacional (g/semanas/día) | 0.422 ± 0.204<br>(Min 0.004 / Max 1.348) | 0.437 ± 0.201<br>(Min 0.004 / Max 1.348) | 0.350 ± 0.209<br>(Min 0.004 / Max 0.899) | 0.007 |

3. Se realizó el análisis de la diferencia de medias en una sub cohorte que excluye a los recién nacidos de <1000 g al nacimiento, para comprobar si aún eliminando a los neonatos con extremo bajo peso al nacer, persiste la relación entre ganancia de peso y ROP que requiere tratamiento. (Tabla A, se incluye en la nueva versión del manuscrito).

Tabla A. Análisis de la diferencia de medias en una sub cohorte que excluye a los recién nacidos de <1000 g al nacimiento: media y desviación estándar, mínimo (Min) y máximo (Max), diferencia de medias (U de Mann Whitney)

| Variable                                                    | Total                                     | ROP no tratada                            | ROP tratada                              | p     |
|-------------------------------------------------------------|-------------------------------------------|-------------------------------------------|------------------------------------------|-------|
| Ganancia de peso (g/día)                                    | 12.53 ± 6.31<br>(Min 0.14 / Max 39.71)    | 12.947 ± 6.388<br>(Min 0.14 / Max 39.71)  | 8.275 ± 3.230<br>(Min 4.38 / Max 13.46)  | 0.003 |
| Ganancia peso ajustada por edad gestacional (g/semanas/día) | 0.424 ± 0.213<br>(Min 0.004 / Max 1.348)  | 0.438 ± 0.216<br>(Min 0.004 / Max 1.348)  | 0.284 ± 0.115<br>(Min 0.145 / 0.491)     | 0.004 |
| Ganancia peso ajustada por peso al nacer (g/kg/día)         | 0.010 ± 0.006<br>(Min 0.0001 / Max 0.037) | 0.011 ± 0.006<br>(Min 0.001 / Max 0.037)  | 0.007 ± 0.003<br>(Min 0.003 / Max 0.013) | 0.007 |
| Ganancia peso ajustada por edad gestacional y               | 0.306 ± 0.166<br>(Min 0.003 /Max 1.095)   | 0.3168 ± 0.168<br>(Min 0.003 / Max 1.095) | 0.200 ± 0.087<br>(Min 0.085 / Max 0.356) | 0.005 |

|                                                 |  |  |  |  |
|-------------------------------------------------|--|--|--|--|
| peso al nacer<br><br>(g/kg/<br><br>semanas/día) |  |  |  |  |
|-------------------------------------------------|--|--|--|--|

4. Se realizó el ajuste de la ganancia de peso en las primeras 4 semanas de vida con todas las variables de estudio que mostraron diferencias significativas en el análisis bivalente entre los grupos de ROP tratada y no tratada. Las variables que mostraron una mayor influencia sobre la ganancia de peso, y que, por tanto, le restaron cierta potencia a su odds ratio (OR) fueron los mostrados a continuación en la tabla B. Sin embargo, en ningún momento la variable ganancia de peso en las primeras 4 semanas (g/día) perdió su significación estadística. La OR de la ganancia de peso no perdió potencia al ajustar por peso al nacer [OR ganancia de peso y peso al nacer: 0.879 (IC 95%: 0.811 - 0.952), p 0.002]. Todas estas variables fueron incluidas en el modelo de regresión logística que se comenta en el último apartado.

Tabla B. Ajuste de la odds ratio(OR) de la ganancia de peso postnatal en las primeras 4 semanas por las variables de estudio que mostraron mayor variación en la OR de la ganancia de peso no ajustada, mediante regresión logística.

| Variables                                                     | OR    | IC 95%        | p     |
|---------------------------------------------------------------|-------|---------------|-------|
| Ganancia de peso<br><br>(no ajustada)                         | 0.830 | 0.831 - 0.960 | 0.002 |
| Ganancia de peso y<br><br>edad gestacional                    | 0.908 | 0.840 - 0.981 | 0.015 |
| Ganancia de peso y<br><br>días de ventilación<br><br>mecánica | 0.925 | 0.856 - 0.993 | 0.05  |
| Ganancia de peso y<br><br>presencia de                        | 0.921 | 0.857 - 0.989 | 0.024 |

|                  |  |  |  |
|------------------|--|--|--|
| hemorragia       |  |  |  |
| intraventricular |  |  |  |

**Comentario 3.-** En el tratamiento estadístico debería haberse comprobado la normalidad de los datos, pues puede haber algunas variables en las que no sean aplicables tests paramétricos.

**Respuesta al comentario 3.-** En la nueva versión del manuscrito se comprueba la normalidad de todas las variables mediante el test de Kolmogorov-Smirnov. Finalmente se concluye que las variables siguen una distribución no normal en todos los grupos ( $p < 0.05$ ) y se procede a emplear test no paramétricos para estudiar la diferencia de medias (U de Mann Whitney en las variables cuantitativas), de porcentajes ( $\chi^2$  de Pearson en las variables cualitativas dicotómicas) y de distribución (U de Mann Whitney en las variables ordinales). Los resultados, no variaron en las variables cuantitativas ni cualitativas dicotómicas, posiblemente debido al alto tamaño muestral, sin embargo, sí difieren en la variable ordinal test de Apgar, que en este caso no resulta estadísticamente significativo (Tabla 3). Por otro lado, tal y como se indica en el comentario 5, se añade el análisis del test de Apgar a los 5 minutos.

Tabla 3. Estudio descriptivo del estadio ROP (25) y el puntaje en el test de Apgar (26).

Ambas mostraron relación estadísticamente significativa con la aparición de ROP susceptible de tratamiento

| Estadio | No ROP  | ROP 1   | ROP 2   | ROP 3   | ROP 4   | ROP 5   | Mín | Máx | p  |
|---------|---------|---------|---------|---------|---------|---------|-----|-----|----|
| ROP     | 129     | 36      | 18      | 49      | 1       | 0       | 0   | 4   | ** |
| [N (%)] | (55.4%) | (15.5%) | (7.7%)  | (21.0%) | (0.4%)  | (0%)    |     |     |    |
| Apgar 1 | 0       | 1-2     | 3-4     | 5-6     | 7-8     | 9-10    | Mín | Máx |    |
| minuto  | 5       | 25      | 46      | 56      | 66      | 35      | 0   | 10  | *  |
| [N (%)] | (2.1%)  | (10.7%) | (19.7%) | (24.0%) | (28.3%) | (15.0%) |     |     |    |
| Apgar 5 | 0       | 1-2     | 3-4     | 5-6     | 7-8     | 9-10    | Mín | Max |    |
| minutos | 0       | 3       | 11      | 30      | 63      | 126     | 1   | 10  | *  |
| [N (%)] | (0%)    | (1.3%)  | (4.7%)  | (12.9%) | (27.0%) | (54.1%) |     |     |    |

\*U de Mann Whitney ( $p > 0.05$ ), \*\*U de Mann Whitney ( $p < 0.0001$ )

Comentario 4.- En la tabla 1 también se puede observar, como era lógico, que los prematuros con ROP grave presentan menor edad gestacional y menor peso de nacimiento, con mayor morbilidad propia de la mayor inmadurez. En las afecciones analizadas faltaría incluir la hemorragia intraventricular, leucomalacia periventricular y enterocolitis necrosante. También sería interesante ver el tipo de lactancia, ya que la lactancia materna se ha preconizado como protectora de la ROP.

Respuesta al comentario 4.- En la tabla 1 se recogen la mayoría de las variables de estudio relacionadas con la ROP, sin embargo, debido a la limitación de extensión publicada en las normas de publicación relativa a las tablas, ciertas variables de comorbilidad no fueron incluídas en la tabla para limitar así su extensión. En la nueva versión del manuscrito, se desglosa la tabla 1 en dos tablas, y se incluye la información relativa a hemorragia intraventricular, leucomalacia periventricular y enterocolitis necrotizante, las cuales muestran una distribución diferente de forma estadísticamente significativa entre el grupo de ROP candidato a tratamiento y el grupo no candidato a tratamiento.

Anexo tabla 2.

| Variable                     | Total | ROP no tratada | ROP tratada | p   |
|------------------------------|-------|----------------|-------------|-----|
| Hemorragia intraventricular  | 14.0% | 10.5%          | 31.6%       | **  |
| Leucomalacia periventricular | 24.1% | 19.5%          | 47.4%       | *** |
| Enterocolitis necrotizante   | 23.6% | 18.7%          | 47.5%       | *** |

\* p < 0.05; \*\* p < 0.001; \*\*\* p < 0.0001; † p > 0.05.

Con respecto al tipo de lactancia de los neonatos, su recogida en las historias clínicas entre 1999 y 2019 no fue completa en todos los casos. En los años entre 2009 y 2019, la información se recoge de forma más detallada, pero incompleta en la mayoría de los casos (no se conoce la fecha de inicio, la duración, si la lactancia fue materna exclusiva o mixta), lo que hace que la información sea ambigua y no apta para su análisis estadístico. Este hecho se incluye en las debilidades del estudio.

Comentario 5.- Dada la interrelación entre la mayoría de variables para la "asociación" con la gravedad de la ROP, los autores hacen bien en aplicar la regresión logística, pero ésta debería haber incluido todas las variables que en el estudio bivalente tengan una  $p < 0,2$ , como suele recomendarse. Seguramente entonces habrían salido como factores significativos la edad gestacional, el peso de nacimiento, duración de la ventilación mecánica, nº de transfusiones, sepsis, ductus, Apgar 1 minuto o Apgar 5 minutos (que siempre suele ser el escogido cuando están los dos), hemorragia intraventricular, enterocolitis necrosante, etc., perdiendo significación el aumento de peso postnatal en g/d.

Respuesta al comentario 5.- Se realizó el análisis bivalente de la ganancia de peso con todas las variables de estudio. Aquellas que presentaron valor estadístico significativo (o  $p < 0.2$ ) se presentan a continuación en la tabla C. Se incluyó el análisis de Apgar a los 5 minutos en la Tabla 2.

Tabla C.

| Variable                                           | p       |
|----------------------------------------------------|---------|
| Edad gestacional (semanas)                         | <0.0001 |
| Peso al nacer (g)                                  | <0.0001 |
| Duración de ventilación mecánica (días)            | <0.0001 |
| Número de transfusiones recibidas                  | 0.0190  |
| FiO <sub>2</sub> máxima                            | 0.0057  |
| Presencia/ausencia de ductus arteriovenoso         | 0.0010  |
| Presencia/ausencia de sepsis                       | 0.0060  |
| Presencia/ausencia de hemorragia intraventricular  | 0.0080  |
| Presencia/ausencia de leucomalacia periventricular | 0.0010  |
| Presencia/ausencia de enterocolitis necrotizante   | <0.0001 |
| Puntaje test Apgar al minuto                       | 0.054   |
| Puntaje test Apgar a los 5 minutos                 | 0.115   |

Por ello, se realizó una nueva regresión logística global incluyendo todas las variables con  $p < 0.2$  en el análisis bivalente. En esta regresión logística global se observó que el 62.8% (R<sup>2</sup> de Nagelkerke: 62.8%,  $p < 0.001$ ) de los cambios de necesidad de tratamiento



entre los grupos ROP tratada y no tratada, se explican por estas variables (edad gestacional, peso al nacer, duración de la ventilación mecánica, número de transfusiones recibidas, FiO2 máxima, presencia/ausencia de ductus arteriovenoso, sepsis, hemorragia intraventricular, leucomalacia periventricular y enterocolitis, y puntaje del test de Apgar). La OR de la ganancia de peso en el modelo de regresión logística global fue 0.797 [IC 95%: 0.684 - 0.929),  $p = 0.004$ ].

Centrándonos en los factores de riesgo evitables y basándonos en las cifras obtenidas de la regresión global se obtuvo:

- La ecuación de probabilidad de ROP que requiere tratamiento en función sólo de la ganancia de peso en las primeras 4 semanas (suponiendo que el resto de variables independientes permanecieran constantes):  $\text{Prob} = 1 / (1 + e^{-[-1.596 + (-0.078 \cdot \text{g/día})]})$
- Con tan sólo con la ganancia ponderal en las primeras 4 semanas ( $p = 0.004$ ) y la duración de la ventilación mecánica ( $p = 0.043$ ) se logró explicar el 26.9% de las variaciones en la severidad de ROP que condiciona la necesidad de recibir o no tratamiento ( $R^2$  Nagelkerke: 26.9%,  $p < 0.001$ ).

Le agradecemos su atención y quedamos a su completa disposición para cualquier asunto.

Atentamente,

Los autores

## Bibliografía:

1. Garcia-Serrano JL, Uberos Fernández J, Anaya-Alaminos R, Jerez-Calero A, Padilla-Torres JF, Ramírez-García MC, et al. Oxygen with love; and diode laser treatment decreases comorbidity and avoidable blindness due to retinopathy of prematurity: results achieved in the past 12 years. *Pediatr Neonatol*. 2013 Dec 1; 54(6):397–401.
2. Chow LC, Wright KW, Sola A, Fillafer S, Forbis S, Mack E, et al. Can changes in clinical practice decrease the incidence of severe retinopathy of prematurity in very low birth weight infants? *Pediatrics*. 2003 Feb 1; 111(2):339–45.
3. Filho JBF, Bonomo PP, Maia M, Procianoy RS. Weight gain measured at 6 weeks after birth as a predictor for severe retinopathy of prematurity: study with 317 very low birth weight preterm babies. *Graefe's Arch Clin Exp Ophthalmol*. 2009 Jun 4;247(6):831–6.
4. Löfqvist C, Hansen-Pupp I, Andersson E, Holm K, Smith LEH, Ley D, et al. Validation of a New Retinopathy of Prematurity Screening Method Monitoring Longitudinal Postnatal Weight and Insulinlike Growth Factor I. *Arch Ophthalmol*. 2009 May 11;127(5):622.
5. Kirpalani H, Whyte RK, Andersen C, Asztalos E V., Heddle N, Blajchman MA, et al. The premature infants in need of transfusion (pint) study: A randomized, controlled trial of a restrictive (LOW) versus liberal (HIGH) transfusion threshold for extremely low birth weight infants. *J Pediatr*. 2006 Sep 1;149(3):301-307.e3.
6. Binenbaum G, Ying GS, Quinn GE, Dreiseitl S, Karp K, Roberts RS, et al. A clinical prediction model to stratify retinopathy of prematurity risk using postnatal weight gain. *Pediatrics*. 2011 Mar;127(3).
7. Allegaert, Vanhole, Casteels, Naulaers, Debeer, Cossey, et al. Perinatal growth characteristics and associated risk of developing threshold retinopathy of prematurity. *J Am Assoc Pediatr Ophthalmol Strabismus*. 2003 Feb;7(1):34–7.
8. Eckert GU, Fortes Filho JB, Maia M, Procianoy RS. A predictive score for retinopathy of prematurity in very low birth weight preterm infants. *Eye*. 2012 Mar; 26(3):400–6.
9. Van Sorge AJ, Termote JUM, Simonsz HJ, Kerkhoff FT, Van Rijn LJ, Lemmens WAJG, et al. Outcome and quality of screening in a nationwide survey on retinopathy of prematurity in the Netherlands. *Br J Ophthalmol*. 2014;98(8):1056–60.
10. Wallace DK, Kylstra JA, Phillips SJ, Hall JG. Poor postnatal weight gain: A risk factor for severe retinopathy of prematurity. *J AAPOS*. 2000 Dec 1;4(6):343–7.

11. Cao JH, Wagner BD, Cerda A, McCourt EA, Palestine A, Enzenauer RW, et al. Colorado retinopathy of prematurity model: A multi-institutional validation study. In: Journal of AAPOS. Mosby Inc.; 2016. p. 220–5.
12. Sáenz De Pipaón Marcos M. El crecimiento intrahospitalario del recién nacido de muy bajo peso en España. Vol. 68, Anales de Pediatría. Ediciones Doyma, S.L.; 2008. p. 203–5.
13. Paisán Grisolia L, Sota Busselo I, Muga Zurriarán Imaz Murgiondo Hospital Donostia San Sebastián OM. El recién nacido de bajo peso. In: Protocolos de la Asociación Española de Pediatría [Internet]. 2o. Asociación Española de Pediatría, Sociedad Española de Neonatología; 2008. p. 78–9. Available from: [https://www.aeped.es/sites/default/files/documentos/9\\_1.pdf](https://www.aeped.es/sites/default/files/documentos/9_1.pdf)
14. García-Muñoz Rodrigo F, Figueras Aloy J, Saavedra Santana P, García-Alix A. Crecimiento posnatal hasta el alta hospitalaria en recién nacidos extremadamente prematuros españoles. An Pediatría. 2017 Dec 1; 87(6):301–10.
15. García-Serrano JL, Ramírez-García MC, Piñar-Molina R. Retinopathy of prematurity in multiple births: risk analysis for plus disease. Arch Soc Esp Oftalmol [Internet]. 2009 Apr; 84(4):191–8.
16. Chan-Ling T, Gock B, Stone J. The effect of oxygen on vasoformative cell division: Evidence that “physiological hypoxia” is the stimulus for normal retinal vasculogenesis. Investig Ophthalmol Vis Sci. 1995;36(7):1201–14.
17. Hughes S, Yang H, Chan-Ling T. Vascularization of the human fetal retina: Roles of vasculogenesis and angiogenesis. Investig Ophthalmol Vis Sci. 2000;41(5):1217–28.
18. The STOP-ROP Multicenter Study Group. Supplemental therapeutic oxygen for prethreshold retinopathy of prematurity (STOP-ROP), a randomized, controlled trial. I: Primary outcomes. Pediatrics. 2000 Feb 1;105(2):295–310.
19. Hikino S, Ihara K, Yamamoto J, Takahata Y, Nakayama H, Kinukawa N, et al. Physical growth and retinopathy in preterm infants: Involvement of IGF-I and GH. Pediatr Res. 2001 Dec; 50(6):732–6.
20. Hellström A, Engström E, Hård A-L, Albertsson-Wikland K, Carlsson B, Niklasson A, et al. Postnatal serum insulin-like growth factor I deficiency is associated with retinopathy of prematurity and other complications of premature birth. Pediatrics. 2003 Nov; 112(5):1016–20.
21. Löfqvist C, Andersson E, Sigurdsson J, Engström E, Hård A-L, Niklasson A, et al. Longitudinal Postnatal Weight and Insulin-like Growth Factor I Measurements in the Prediction of Retinopathy of Prematurity. Arch Ophthalmol. 2006 Dec 1; 124(12):1711.

22. Hellström A, Hård A-L, Engström E, Niklasson A, Andersson E, Smith L, et al. Early weight gain predicts retinopathy in preterm infants: new, simple, efficient approach to screening. *Pediatrics*. 2009 Apr 1; 123(4):e638-45.
23. Wu C, VanderVeen DK, Hellström A, Löfqvist C, Smith LEH. Longitudinal Postnatal Weight Measurements for the Prediction of Retinopathy of Prematurity. *Arch Ophthalmol*. 2010 Apr 1; 128(4):443.
24. Cutland CL, Lackritz EM, Mallett-Moore T, Bardají A, Chandrasekaran R, Lahariya C, et al. Low birth weight: Case definition & guidelines for data collection, analysis, and presentation of maternal immunization safety data. Vol. 35, *Vaccine*. Elsevier Ltd; 2017. p. 6492–500.
25. Committee for the Classification of Retinopathy of Prematurity. The International Classification of Retinopathy of Prematurity Revisited. *Arch Ophthalmol*. 2005 Jul 1; 123(7):991.
26. Apgar V. A proposal for a new method of evaluation of the newborn infant. In: *Anesthesia and Analgesia*. Lippincott Williams and Wilkins; 2015. p. 1056–9.
